# Supplementary material for: Estimating the mean and variance from the median, range, and the size of a sample
Source: PubMed Central journal article supplement (PMC1097734; doi:10.1186/1471-2288-5-13), 2005-04-20
Supplement: 1471-2288-5-13-S3.pdf [file 1471-2288-5-13-S3.pdf]

|                                                                                                                                                                                        |                                                                                                                                                                          | The Sample size ranges from 8 to 15.                                                                                                                                         | The Sample size ranges from 16 to 35.                                                                                                 | The Sample size ranges from 36 to 72.                                                                                            | The Sample size ranges from 73 to 120 and beyond.                             |
|----------------------------------------------------------------------------------------------------------------------------------------------------------------------------------------|--------------------------------------------------------------------------------------------------------------------------------------------------------------------------|------------------------------------------------------------------------------------------------------------------------------------------------------------------------------|---------------------------------------------------------------------------------------------------------------------------------------|----------------------------------------------------------------------------------------------------------------------------------|-------------------------------------------------------------------------------|
| <b>Approximation of the mean.</b> Each number in this table represents the average relative error of estimating the sample mean in 200 samples from a Beta distribution.               | <b>LEGEND:</b><br>The median approximation is represented by black crosses, Formula (4) is represented by blue boxes, and Formula (5) by red diamonds.                   |                                                                                                                                                                              |                                                                                                                                       |                                                                                                                                  |                                                                               |
|                                                                                                                                                                                        | <b>Median</b>                                                                                                                                                            | 3.73 %                                                                                                                                                                       | 3.21 %                                                                                                                                | 2.88 %                                                                                                                           | 2.74 %                                                                        |
|                                                                                                                                                                                        | <b>Formula (4)</b>                                                                                                                                                       | 2.46 %                                                                                                                                                                       | 3.03 %                                                                                                                                | 3.91 %                                                                                                                           | 4.70 %                                                                        |
|                                                                                                                                                                                        | <b>Formula (5)</b>                                                                                                                                                       | 2.23 %                                                                                                                                                                       | 2.86 %                                                                                                                                | 3.80 %                                                                                                                           | 4.62 %                                                                        |
|                                                                                                                                                                                        | <b>Conclusion</b>                                                                                                                                                        | Formula (5) is within 2% of the actual sample mean and is performing the best. Formula (4) is almost indistinguishable from Formula (5), and the median is very close behind | All three of these formulas are very close, but the median approximation starts being the best when the sample size reaches about 30. | The median continues to be the best estimator, separating itself from the other two formulas for the sample sizes in this range. | The averages stabilize and remain fairly steady as the sample size increases. |
| <b>Approximation of the standard deviation.</b> Each number in this table represents the average relative error of estimating the sample mean in 200 samples from a Beta distribution. | <b>LEGEND:</b><br>The Formula (12) is shown using black crosses, Formula (16) is represented by blue boxes; Range/4 by the green circles, and Range/6 by brown diamonds. |                                                                                                                                                                              |                                                                                                                                       |                                                                                                                                  |                                                                               |
|                                                                                                                                                                                        | <b>Formula (12)</b>                                                                                                                                                      | 10.47 %                                                                                                                                                                      | 12.77 %                                                                                                                               | 17.44 %                                                                                                                          | 23.19 %                                                                       |
|                                                                                                                                                                                        | <b>Formula (16)</b>                                                                                                                                                      | 8.87 %                                                                                                                                                                       | 16.32 %                                                                                                                               | 29.15 %                                                                                                                          | 39.41 %                                                                       |
|                                                                                                                                                                                        | <b>Range/4</b>                                                                                                                                                           | 16.12 %                                                                                                                                                                      | 8.91 %                                                                                                                                | 12.09 %                                                                                                                          | 19.33 %                                                                       |
|                                                                                                                                                                                        | <b>Range/6</b>                                                                                                                                                           | 43.75 %                                                                                                                                                                      | 34.21 %                                                                                                                               | 26.34 %                                                                                                                          | 20.56 %                                                                       |
| <b>Conclusion</b>                                                                                                                                                                      | Formula (16) is the best estimator of the standard deviation in this range of sample sizes.                                                                              | The Range/4 formula takes over as the best estimate for the variance                                                                                                         | The Range/4 formula is slowly losing its advantage, and the Range/6 formula is closing in.                                            | The Range/6 takes over the lead in accuracy when the sample size reaches 100, and keeps it as the sample sizes increase.         |                                                                               |

TABLE 3: Beta Distribution with parameters  $a = 9$  and  $b = 4$ .
